# Supplementary material for: Biallelic variants in RINT1 present as early-onset pure hereditary spastic paraplegia
Source: PubMed Central journal article supplement (PMC11364375; doi:10.1172/jci178919), 2024-07-11

Human fibroblasts

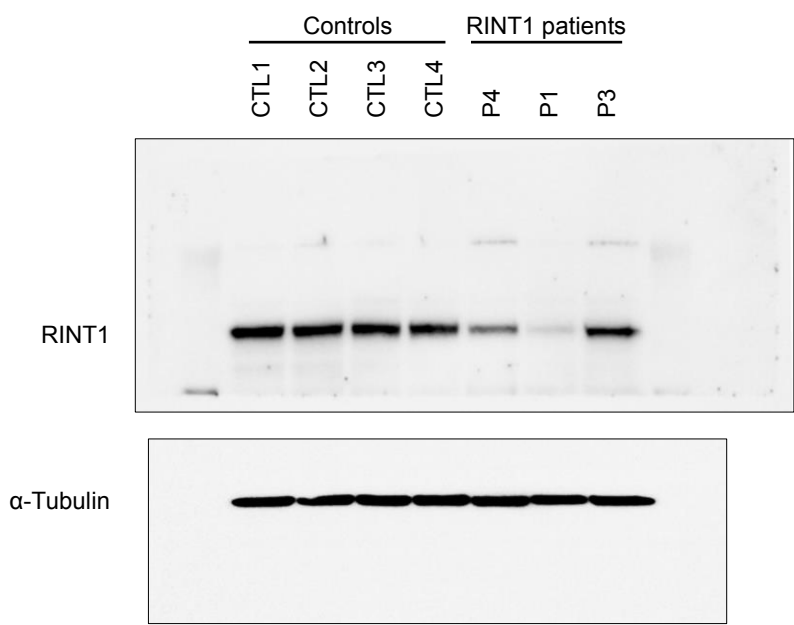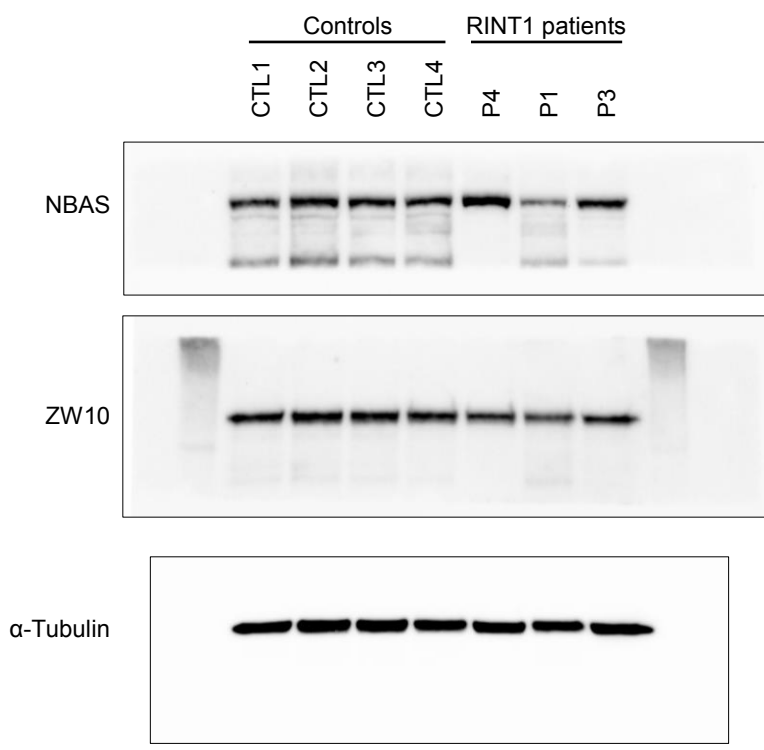

Supplement: jci-134-178919-s028.pdf [file jci-134-178919-s028.pdf]
